# Supplementary material for: Phosphorylation-dependent Pex11p and Fis1p interaction regulates peroxisome division
Source: PubMed Central journal article supplement — Mol Biol Cell. 2012 Apr 1;23(7):1307–15. doi: 10.1091/mbc.E11-09-0782 (PMC3315806; doi:10.1091/mbc.e11-09-0782), 2012-04-01
Supplement: supp_E11-09-0782_CombinedSupMats.pdf [file supp_E11-09-0782_CombinedSupMats.pdf]

Figure S1

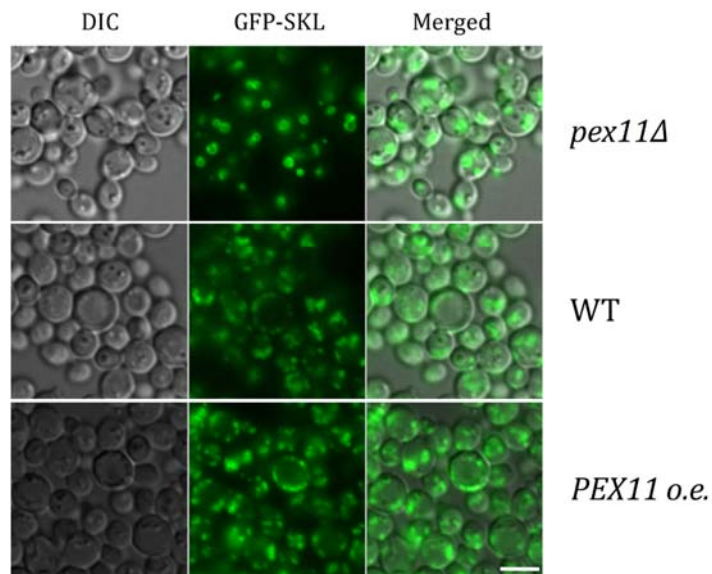

**SUPPLEMENTARY FIGURE S1.** Peroxisome morphology of *pex11Δ*, wild-type (WT) as well as *PEX11* overexpression strains in oleate medium. *pex11Δ* cells, cells expressing wild-type (WT) Pex11p, as well as cells over-expressing Pex11p (*PEX11 o.e.*), were grown in YPD and transferred to oleate medium and incubated 6-8 h and analyzed by microscopy. All the strains also contained GFP-SKL expressed from *GAP* promoter for monitoring peroxisomes. DIC, differential interference contrast. Scale bar, 5  $\mu$ m.
